# Supplementary material for: Exogenous Hydrogen Sulfide Mitigates Oxidative Stress and Mitochondrial Damages Induced by Polystyrene Microplastics in Osteoblastic Cells of Mice
Source: Hindawi journal article supplement (doi:10.1155/2023/2516472), 2023-02-18
Supplement: f1 [file 2516472.f1.pdf]

Tabel S1 Data used for CCK8 with different concentrations of mic-PS

| control | 50     | 100    | 150    |
|---------|--------|--------|--------|
| 1.2967  | 1.0124 | 0.5697 | 0.6322 |
| 0.9895  | 0.8896 | 0.6278 | 0.4065 |
| 1.3544  | 1.4051 | 0.6081 | 0.7927 |
| 1.1635  | 1.0245 | 0.5123 | 0.7533 |
| 1.0689  | 1.1292 | 0.6741 | 0.3214 |
