# Supplementary material for: Exogenous Hydrogen Sulfide Mitigates Oxidative Stress and Mitochondrial Damages Induced by Polystyrene Microplastics in Osteoblastic Cells of Mice
Source: Hindawi journal article supplement (doi:10.1155/2023/2516472), 2023-02-18
Supplement: f2 [file 2516472.f2.pdf]

Tabel S2 Data used for CCK8 with different  
time of mic-PS

| control | 12h    | 24h    | 36h    |
|---------|--------|--------|--------|
| 1.3476  | 1.0242 | 0.5642 | 0.6765 |
| 0.9942  | 1.0111 | 0.4521 | 0.7941 |
| 1.4321  | 0.9968 | 0.6376 | 0.6524 |
| 1.2531  | 1.0234 | 0.9215 | 0.4531 |
| 1.0798  | 0.7853 | 0.623  | 0.6922 |
