# Supplementary material for: Exogenous Hydrogen Sulfide Mitigates Oxidative Stress and Mitochondrial Damages Induced by Polystyrene Microplastics in Osteoblastic Cells of Mice
Source: Hindawi journal article supplement (doi:10.1155/2023/2516472), 2023-02-18
Supplement: f3 [file 2516472.f3.pdf]

Tabel S3 Data used for CCK8/ROS/MMP

| CCK8 |         |        |            |        |
|------|---------|--------|------------|--------|
|      | control | Mic-PS | Mic-PS+H2S | H2S    |
|      | 1.1496  | 0.7697 | 0.9027     | 0.8846 |
|      | 0.9973  | 0.6678 | 0.8991     | 0.9813 |
|      | 1.2698  | 0.4081 | 1.0542     | 1.1674 |
|      | 1.0936  | 0.6321 | 0.8098     | 0.9929 |
|      | 1.0689  | 0.5012 | 1.0595     | 1.0559 |
| ROS  |         |        |            |        |
|      | control | Mic-PS | Mic-PS+H2S | H2S    |
|      | 17.295  | 35.922 | 19.12      | 20.371 |
|      | 17.142  | 38.199 | 19.148     | 19.33  |
|      | 16.013  | 34.215 | 20.01      | 18.015 |
| MMP  |         |        |            |        |
|      | control | Mic-PS | Mic-PS+H2S | H2S    |
|      | 24.847  | 8.853  | 19.179     | 19.469 |
|      | 19.198  | 11.232 | 21.228     | 19.661 |
|      | 22.625  | 11.31  | 20.187     | 22.137 |
