# Supplementary material for: Exogenous Hydrogen Sulfide Mitigates Oxidative Stress and Mitochondrial Damages Induced by Polystyrene Microplastics in Osteoblastic Cells of Mice
Source: Hindawi journal article supplement (doi:10.1155/2023/2516472), 2023-02-18
Supplement: f4 [file 2516472.f4.pdf]

Tabel S4 Data used for QPCR analysis

| gene     | group    | Ct          | GADPH Ct | $\Delta$ Ct | $\Delta \Delta$ Ct |       |
|----------|----------|-------------|----------|-------------|--------------------|-------|
| Bmp4     | control1 | 26.72       | 16.77    | 9.95        |                    |       |
|          | control2 | 27          | 16.84    | 10.16       |                    |       |
|          | control3 | 27.13       | 16.81    | 10.32       |                    |       |
|          | control4 | 27.5        | 16.82    | 10.68       |                    |       |
|          | control5 | 27.6        | 16.8     | 10.8        |                    |       |
|          |          |             |          |             |                    |       |
|          |          | Mic-PS 1    | 25.87    | 14.93       | 10.94              | 0.99  |
|          |          | Mic-PS 2    | 25.83    | 14.93       | 10.9               | 0.74  |
|          |          | Mic-PS 3    | 25.14    | 14.03       | 11.11              | 0.79  |
|          |          | Mic-PS 4    | 25.06    | 14.01       | 11.05              | 0.37  |
|          |          | Mic-PS 5    | 24.18    | 13.01       | 11.17              | 0.37  |
|          |          |             |          |             |                    | 0     |
|          |          | H2S+Mic-PS1 | 24.34    | 14.19       | 10.15              | 0.2   |
|          |          | H2S+Mic-PS2 | 24.86    | 14.27       | 10.59              | 0.43  |
|          |          | H2S+Mic-PS3 | 24.43    | 14.01       | 10.42              | 0.1   |
|          |          | H2S+Mic-PS4 | 25.91    | 14.78       | 11.13              | 0.45  |
|          |          | H2S+Mic-PS5 | 25.43    | 14.21       | 11.22              | 0.42  |
|          |          |             |          |             |                    | 0     |
|          |          | H2S1        | 25.17    | 15.23       | 9.94               | -0.01 |
|          |          | H2S2        | 25.51    | 15.43       | 10.08              | -0.08 |
|          |          | H2S3        | 25.5     | 15.01       | 10.49              | 0.17  |
|          |          | H2S4        | 25.48    | 14.76       | 10.72              | 0.04  |
|          |          | H2S5        | 25.99    | 15.01       | 10.98              | 0.18  |
|          | Myh6     | control1    | 25.38    | 16.77       | 8.61               |       |
|          |          | control2    | 25.61    | 16.84       | 8.77               |       |
| control3 |          | 25.35       | 16.81    | 8.54        |                    |       |
| control4 |          | 25.64       | 16.82    | 8.82        |                    |       |
| control5 |          | 25.27       | 16.8     | 8.47        |                    |       |
|          |          |             |          |             |                    |       |
|          |          | Mic-PS 1    | 24.37    | 14.93       | 9.44               | 0.83  |
|          |          | Mic-PS 2    | 24.33    | 14.93       | 9.4                | 0.63  |
|          |          | Mic-PS 3    | 23.35    | 14.03       | 9.32               | 0.78  |
|          |          | Mic-PS 4    | 23.89    | 14.01       | 9.88               | 1.06  |
|          |          | Mic-PS 5    | 22.45    | 13.01       | 9.44               | 0.97  |
|          |          |             |          |             |                    | 0     |
|          |          | H2S+Mic-PS1 | 23.01    | 14.19       | 8.82               | 0.21  |
|          |          | H2S+Mic-PS2 | 23.28    | 14.27       | 9.01               | 0.24  |
|          |          | H2S+Mic-PS3 | 22.8     | 14.01       | 8.79               | 0.25  |
|          |          | H2S+Mic-PS4 | 24.08    | 14.78       | 9.3                | 0.48  |
|          |          | H2S+Mic-PS5 | 22.97    | 14.21       | 8.76               | 0.29  |
|          |          |             |          |             |                    | 0     |
|          |          | H2S1        | 23.89    | 15.23       | 8.66               | 0.05  |
|          |          | H2S2        | 24.42    | 15.43       | 8.99               | 0.22  |
|          |          | H2S3        | 23.72    | 15.01       | 8.71               | 0.17  |
|          |          | H2S4        | 23.63    | 14.76       | 8.87               | 0.05  |
|          |          | H2S5        | 23.71    | 15.01       | 8.7                | 0.23  |
|          |          |             |          |             |                    | 0     |
| Actc1    |          | control1    | 27.98    | 16.77       | 11.21              |       |
|          | control2 | 28.53       | 16.84    | 11.69       |                    |       |
|          | control3 | 27.98       | 16.81    | 11.17       |                    |       |
|          | control4 | 27.94       | 16.82    | 11.12       |                    |       |
|          | control5 | 27.33       | 16.8     | 10.53       |                    |       |
|          |          |             |          |             |                    |       |
|          |          | Mic-PS 1    | 27.69    | 14.93       | 12.76              | 1.55  |
|          |          | Mic-PS 2    | 27.59    | 14.93       | 12.66              | 0.97  |

|             |       |       |       |      |
|-------------|-------|-------|-------|------|
| Mic-PS 3    | 26.64 | 14.03 | 12.61 | 1.44 |
| Mic-PS 4    | 26.13 | 14.01 | 12.12 | 1    |
| Mic-PS 5    | 24.35 | 13.01 | 11.34 | 0.81 |
|             |       |       | 0     |      |
| H2S+Mic-PS1 | 25.98 | 14.19 | 11.79 | 0.58 |
| H2S+Mic-PS2 | 26.52 | 14.27 | 12.25 | 0.56 |
| H2S+Mic-PS3 | 25.38 | 14.01 | 11.37 | 0.2  |
| H2S+Mic-PS4 | 26.32 | 14.78 | 11.54 | 0.42 |
| H2S+Mic-PS5 | 25.38 | 14.21 | 11.17 | 0.64 |
|             |       |       | 0     |      |
| H2S1        | 26.58 | 15.23 | 11.35 | 0.14 |
| H2S2        | 27.24 | 15.43 | 11.81 | 0.12 |
| H2S3        | 26.26 | 15.01 | 11.25 | 0.08 |
| H2S4        | 26.09 | 14.76 | 11.33 | 0.21 |
| H2S5        | 25.82 | 15.01 | 10.81 | 0.28 |

---
